# Supplementary material
Source: Springer Nature journal article supplement (https://www.springermedizin.de/resource/supplementary/12879_2005_315_MOESM2_ESM.pdf/9448758)
Supplement: MOESM2 [file 9448758]

**Additional file 2: Comparison between the results from our study and those from other publications.**

| Species <sup>a</sup>          | Antimicrobial agent          | This study      | Other studies      |                                |                                |                    | Method <sup>b</sup>            | Medium <sup>c</sup> | Incubation <sup>d</sup> | Reference |                          |
|-------------------------------|------------------------------|-----------------|--------------------|--------------------------------|--------------------------------|--------------------|--------------------------------|---------------------|-------------------------|-----------|--------------------------|
|                               |                              |                 | Range <sup>e</sup> | MIC <sub>50</sub> <sup>e</sup> | MIC <sub>90</sub> <sup>e</sup> | Range <sup>e</sup> |                                |                     |                         |           | Number of strains tested |
| <i>Bifidobacterium longum</i> | Ampicillin                   | 0.25            | 3.12               | 6.25                           | < 0.19 - 12.5                  | 21                 | BDM                            | A                   | AN                      | [34]      |                          |
|                               | Clindamycin                  | < 0.016         | ≤ 0.5              | 64                             | ≤ 0.5 - ≥ 256                  | 47                 | Sensititre Anaero3 kit and ADM | B and C             | AN                      | [33]      |                          |
|                               | Kanamycin                    | 32              | 200                | 800                            | 100 - 800                      | 21                 | BDM                            | A                   | AN                      | [34]      |                          |
|                               | Linezolid                    | 0.25            | 1                  | 1                              | 0.5 - 1                        | 14                 | ADM                            | D                   | AN                      | [35]      |                          |
|                               | Metronidazole                | 4               | 2                  | ≥ 64                           | ≤ 0.5 - ≥ 64                   | 47                 | Sensititre Anaero3 kit and ADM | B and C             | AN                      | [33]      |                          |
|                               | Nalidixic acid               | > 256           | 400                | 800                            | 200-800                        | 21                 | BDM                            | A                   | AN                      | [34]      |                          |
|                               | Penicillin G                 | 0.19            | 0.12               | 0.25                           | 0.12 - 2                       | 47                 | Sensititre Anaero3 kit and ADM | B and C             | AN                      | [33]      |                          |
|                               | Penicillin G                 | 0.19            | 0.25               | 0.5                            | ≤ 0.06 - 1                     | 14                 | ADM                            | D                   | AN                      | [35]      |                          |
|                               | Penicillin G                 | 0.19            | 0.39               | 0.78                           | < 0.19 - 0.78                  | 21                 | BDM                            | A                   | AN                      | [34]      |                          |
|                               | Vancomycin                   | 0.38            | ≤ 2                | ≤ 2                            | ≤ 2 - 4                        | 47                 | Sensititre Anaero3 kit and ADM | B and C             | AN                      | [33]      |                          |
| <i>Bifidobacterium breve</i>  | Vancomycin                   | 0.38            | 0.5                | 1                              | 0.25 - 1                       | 14                 | ADM                            | D                   | AN                      | [35]      |                          |
|                               | Vancomycin                   | 0.38            | 0.78               | 3.12                           | 0.39 - 3.12                    | 21                 | BDM                            | A                   | AN                      | [34]      |                          |
|                               | Linezolid                    | 0.38            | 1                  | 1                              | 1                              | 6                  | ADM                            | D                   | AN                      | [35]      |                          |
|                               | Penicillin G                 | 0.5             | 0.25               | 0.5                            | ≤ 0.06 - 0.5                   | 6                  | ADM                            | D                   | AN                      | [35]      |                          |
|                               | Vancomycin                   | 1               | 0.5                | 0.5                            | 0.25 - 1                       | 6                  | ADM                            | D                   | AN                      | [35]      |                          |
|                               | <i>Gardnerella vaginalis</i> | Ampicillin      | < 0.016 - 0.047    | 0.5                            | 1                              | 0.25 - 4           | 24                             | Etest               | E                       | AN        | [25]                     |
|                               |                              | Ampicillin      | < 0.016 - 0.047    | 0.5                            | 0.5                            | 0.03 - 1           | 93                             | ADM                 | F                       | AE        | [27]                     |
|                               |                              | Cefuroxime      | < 0.016 - 0.125    | 1                              | 4                              | 0.06 - 4           | 93                             | ADM                 | F                       | AE        | [27]                     |
|                               |                              | Ciprofloxacin   | 0.75 - 2           | 1                              | 2                              | 1 - 4              | 93                             | ADM                 | F                       | AE        | [27]                     |
|                               |                              | Clindamycin     | < 0.016 - 0.047    | < 0.06                         | < 0.06                         | < 0.06             | 56                             | ADM                 | G                       | AN        | [28]                     |
| Clindamycin                   |                              | < 0.016 - 0.047 | 0.5                | 1                              | ≤ 0.12 - 1                     | 24                 | Etest                          | E                   | AN                      | [25]      |                          |
| Clindamycin                   |                              | < 0.016 - 0.047 | 0.01               | 0.03                           | 0.007 - 0.03                   | 93                 | ADM                            | F                   | AE                      | [27]      |                          |
| Clindamycin                   |                              | < 0.016 - 0.047 | 0.03               | 0.03                           | 0.03 - 0.06                    | 15                 | ADM                            | D                   | AN                      | [29]      |                          |
| Clindamycin                   |                              | < 0.016 - 0.047 | ≤ 0.03             | 0.125                          | ≤ 0.03 - 0.25                  | 108                | ADM                            | D                   | AN                      | [30]      |                          |
| Colistin                      |                              | > 1024          | > 128              | > 128                          | > 128                          | 56                 | ADM                            | G                   | AN                      | [28]      |                          |
| Doxycycline                   |                              | 0.25 - 32       | 1                  | 16                             | 0.125 - 32                     | 108                | ADM                            | D                   | AN                      | [30]      |                          |
| Kanamycin                     |                              | 16 - 32         | 8                  | 16                             | 4 - 32                         | 56                 | ADM                            | G                   | AN                      | [28]      |                          |
| Metronidazole                 |                              | 0.75 - 16       | < 0.03             | > 16                           | < 0.03 - > 16                  | 9                  | ADM                            | H                   | AE                      | [31]      |                          |
| Metronidazole                 |                              | 0.75 - 16       | 8                  | 16                             | 2 - 128                        | 93                 | ADM                            | F                   | AN                      | [27]      |                          |
| Metronidazole                 | 0.75 - 16                    | 8               | 64                 | 0.06 - 128                     | 15                             | ADM                | D                              | AN                  | [29]                    |           |                          |
| Metronidazole                 | 0.75 - 16                    | 8               | > 32               | ≤ 0.25 - >32                   | 108                            | ADM                | D                              | AN                  | [30]                    |           |                          |

| Species <sup>a</sup>           | Antimicrobial agent | This study         | Other studies                  | Method <sup>b</sup>            | Medium <sup>c</sup>  | Incubation <sup>d</sup>  | Reference                      | Medium <sup>c</sup> | Incubation <sup>d</sup> | Reference |
|--------------------------------|---------------------|--------------------|--------------------------------|--------------------------------|----------------------|--------------------------|--------------------------------|---------------------|-------------------------|-----------|
|                                |                     | Range <sup>e</sup> | MIC <sub>50</sub> <sup>e</sup> | MIC <sub>90</sub> <sup>e</sup> | Range <sup>e</sup>   | Number of strains tested |                                |                     |                         |           |
|                                | Nalidixic acid      | > 256              | > 128                          | > 128                          | > 128                | 56                       | ADM                            | G                   | AN                      | [28]      |
|                                | Penicillin G        | 0.004 - 0.047      | 0.035                          | 0.07                           | 0.035 – 0.15         | 56                       | ADM                            | G                   | AN                      | [28]      |
|                                | Penicillin G        | 0.004 - 0.047      | 0.12                           | 0.5                            | 0.015 -0.5           | 93                       | ADM                            | F                   | AE                      | [27]      |
|                                | Rifampicin          | 0.5 - 0.75         | 1                              | 2                              | 0.5-0.5 <sup>f</sup> | 93                       | ADM                            | F                   | AE                      | [27]      |
|                                | Vancomycin          | 0.125 - 0.38       | 0.25                           | 0.5                            | 0.25 – 0.5           | 56                       | ADM                            | G                   | AN                      | [28]      |
|                                | Vancomycin          | 0.125 - 0.38       | 0.25                           | 0.5                            | 0.12 – 0.5           | 93                       | ADM                            | F                   | AE                      | [27]      |
| <i>Lactobacillus crispatus</i> | Clindamycin         | < 0.016            | 0.12                           | > 256                          | ≤ 0.03 - > 256       | 6                        | Etest                          | I                   | AN                      | [32]      |
| <i>Lactobacillus gasseri</i>   | Clindamycin         | 4                  | 4                              | 8                              | ≤ 0.5 – 8            | 20                       | Sensititre Anaero3 kit and ADM | B and C             | AN                      | [33]      |
|                                | Clindamycin         | 4                  | 16                             | 32                             | 8 – 32               | 4                        | Etest                          | I                   | AN                      | [32]      |
|                                | Metronidazole       | > 256              | ≥ 64                           | ≥ 64                           | ≥ 64                 | 20                       | Sensititre Anaero3 kit and ADM | B and C             | AN                      | [33]      |
|                                | Penicillin G        | 0.047              | ≤ 0.06                         | 0.12                           | ≤ 0.06 – 0.12        | 20                       | Sensititre Anaero3 kit and ADM | B and C             | AN                      | [33]      |
|                                | Vancomycin          | 1                  | ≤ 2                            | 8                              | ≤ 2 – 8              | 20                       | Sensititre Anaero3 kit and ADM | B and C             | AN                      | [33]      |

Legend:

a. In this study one strain was tested for each species, except for *G. vaginalis* (4 strains).

b. ADM: Agar Dilution Method; BDM: Broth Dilution Method; Sensititre Anaero3 kit: Trek Diagnostic Systems, East Grinstead, UK.

c. Media: A: Tryptic Soy Broth, supplemented with 0.2% yeast extract and 0.06% L-cysteine.HCl; B: *Brucella* Standard Broth, supplemented with haemin and vitamin K1; C: MRS-cystein Agar; D: *Brucella* Agar, supplemented with 5% laked sheep blood and vitamin K1 (1 mg/L); E: *Brucella* Blood Agar; F: Human Blood Agar; G: Mueller-Hinton Agar, supplemented with 5% lysed horse blood; H: DST Agar; I: MRS Agar.

d. AN: anaerobic incubation; AE: aerobic incubation.

e. Data in µg/ml.

f. Data as published by the original authors.
